# Supplementary material for: Autochthonous Babesia canis infections in 49 dogs in Germany
Source: PubMed Central journal article supplement — J Vet Intern Med. 2023 Jan 11;37(1):140–9. doi: 10.1111/jvim.16611 (PMC9889677; doi:10.1111/jvim.16611), 2023-01-11
Supplement: JVIM-37-140-s001.pdf [file JVIM-37-140-s001.pdf]

**Supplemental Table 1:** Positive follow-up PCR results in 9 dogs with *B. canis* infection after imidocarb treatment: Day of imidocarb injection, imidocarb dosage and result of PCR test after injection

|                         | 1st injection   | 2nd injection                 | 3rd injection | 4th injection       | 5th injection |
|-------------------------|-----------------|-------------------------------|---------------|---------------------|---------------|
| <b>Dog 1</b>            |                 |                               |               |                     |               |
| Day of injection        | 1               | 33                            |               |                     |               |
| Imidocarb dosage        | 6               | 2.4                           |               |                     |               |
| Day PCR after injection | Positive 21     | Negative 18, 46, 64, 86       |               |                     |               |
| <b>Dog 2</b>            |                 |                               |               |                     |               |
| Day of injection        | 1               | 14                            |               |                     |               |
| Imidocarb dosage        | 4.3             | 4.3                           |               |                     |               |
| Day PCR after injection | Positive 13, 22 | Positive 8, 18<br>Negative 50 |               |                     |               |
| <b>Dog 3</b>            |                 |                               |               |                     |               |
| Day of injection        | 1               | 33                            | 116           | 152                 |               |
| Imidocarb dosage        | 5.5             | 3                             | 3.9           | 6                   |               |
| Day PCR after injection | Positive 32     | Positive 20, 57               | Positive 22   | No further controls |               |
| <b>Dog 4</b>            |                 |                               |               |                     |               |
| Day of injection        | 1               | 19                            |               |                     |               |

|                         |             |                               |                 |             |                 |
|-------------------------|-------------|-------------------------------|-----------------|-------------|-----------------|
| Imidocarb dosage        | 3           | 5                             |                 |             |                 |
| Day PCR after injection | Negative 18 | Positive 8, 31<br>Negative 53 |                 |             |                 |
| <b>Dog 5</b>            |             |                               |                 |             |                 |
| Day of injection        | 1           | 12                            |                 |             |                 |
| Imidocarb dosage        | 5           | 4.6                           |                 |             |                 |
| Day PCR after injection | Positive 12 | Negative 17                   |                 |             |                 |
| <b>Dog 6</b>            |             |                               |                 |             |                 |
| Day of injection        | 1           | 15                            | 36              |             |                 |
| Imidocarb dosage        | 5.4         | 4.3                           | 6               |             |                 |
| Day PCR after injection | Negative 14 | Positive 8, 22                | Negative 15, 57 |             |                 |
| <b>Dog 7</b>            |             |                               |                 |             |                 |
| Day of injection        | 1           | 15                            | 29              | 41          | 75              |
| Imidocarb dosage        | 3           | 3.8                           | 4.5             | 5           | 5               |
| Day PCR after injection | Positive 9  | Positive 10                   | Positive 11     | Positive 28 | Negative 34, 67 |
| <b>Dog 8</b>            |             |                               |                 |             |                 |
| Day of injection        | 1           | 14                            |                 |             |                 |
| Imidocarb dosage        | 3.9         | 4.9                           |                 |             |                 |
| Day PCR after injection | Positive 15 | ND euthanized                 |                 |             |                 |

|                         |            |             |  |  |  |
|-------------------------|------------|-------------|--|--|--|
| <b>Dog 9</b>            |            |             |  |  |  |
| Day of injection        | 1          | 18          |  |  |  |
| Imidocarb dosage        | 3          | 5           |  |  |  |
| Day PCR after injection | Positive 7 | Negative 18 |  |  |  |
